# Supplementary material for: Leaving group effects in reductively triggered fragmentation of 4-nitrobenzyl carbamates †
Source: Royal Society of Chemistry journal article supplement (doi:10.1039/b000135j), 2000-01-01
Supplement: b000135j.doc [file b000135j.doc]

Supplementary Data

Leaving group effects in reductively-triggered fragmentation of 4-nitrobenzyl carbamates

**Bridget M. Sykes,****[[1]](#footnote-2)† Michael P. Hay,****[[2]](#footnote-3)‡* Dubravka Bohinc-Herceg,Error: Reference source not found Nuala A. Helsby, Error: Reference source not found Charmian J. O’Connor,Error: Reference source not found and William. A. Denny,Error: Reference source not found**

Auckland Cancer Society Research Centre, Faculty of Medical and Health Sciences and Department of Chemistry, The University of Auckland, Private Bag 92019, Auckland, New Zealand.

## **Preparation of compounds 10 - 24**

## **Preparation of methyl nitrophenylacetates 10**

#### *Methyl 2-methyl-5-nitrophenylacetate 10b*

A mixture of 96% HNO3 (3.7 cm3) and *c*H2SO4 (8.0 cm3) was added dropwise to a stirred solution of 2-methylphenylacetic acid **8** (11.6 g, 77.4 mmol) in *c*H2SO4 (30 cm3) at -10 °C over 1 h. The mixture was allowed to warm to 20 °C and stirred for 3 h, then poured into ice/water (400 cm3) and stirred for 30 min. The suspension was filtered and air-dried to give crude 2-methyl-5-nitrophenylacetic acid **9** (12.3 g) which contained ca. 40 % of 2-methyl-3,5-dinitrophenylacetic acid. Thionyl chloride (5.9 cm3, 80.7 mmol) was added carefully to a stirred solution of the crude product (3.15 g) and DMF (3 drops) in MeOH (100 cm3) at 5 °C. The solution was stirred at 80 °C for 2 h, then at 20 °C for 16 h. The solvent was evaporated and the residue partitioned between EtOAc (200 cm3) and sat. aq. KHCO3 solution (200 cm3). The organic fraction was washed with 0.1 M NaOH solution (100 cm3), water (100 cm3), brine (50 cm3), dried, and the solvent evaporated. The residue was chromatographed, eluting with 10% EtOAclight petroleum, to give *acetate* **10b** (1.44 g,) as colourless needles, mp (from EtOAclight petroleum) 69-70 °C (Found: C, 57.1; H, 5.1; N, 6.2. C10H11NO4 requires C, 57.4; H, 5.3; N, 6.7%); max/cm-1 1726, 1524, and 1345; H2.41 (3 H, s, CH3), 3.72 (3 H, s, OCH3), 3.74 (2 H, s, CH2), 7.34 (1 H, d, *J* 8.4, 3-H), 8.04 (1 H, dd, *J* 8.4, 2.3, 4-H), and 8.08 (1 H, d, *J* 2.3, 6-H); C 19.9, 38.8, 52.3, 122.5, 125.2, 131.1, 134.3, 145.0, 146.4, and 170.6.

***Methyl 2-methoxy-5-nitrophenylacetate 10c***

A mixture of 96% HNO3 (3.7 cm3) and *c*H2SO4 (8.0 cm3) was added dropwise to a stirred solution of 2-hydroxyphenylacetic acid **11** (11.8 g, 77.5 mmol) in *c*H2SO4 (30 cm3) at -10 °C over 1 h. The mixture was allowed to warm to 20 °C and stirred for 3 h, then poured into ice/water (400 cm3) and stirred for 30 min. The suspension was filtered and air-dried to give crude 2-hydroxy-5-nitrophenylacetic acid **12**. A sample of the crude 5-nitro-2-hydroxyphenylaceticacid (4.3 g, nominally 21.7 mmol) in a solution of NaOH (6.42 g, 16.0 mmol) in water (50 cm3) was cooled to 5 °C and Me2SO4 (16 cm3, 16.8 mmol) added dropwise. The mixture was stirred at 5 °C for 1 h, then warmed to 80 °C for 1 h. The mixture was poured into water (500 cm3), extracted with EtOAc (2 x 100 cm3), the combined organic fractions washed with 0.1 M NaOH solution (2 x 200 cm3), water (200 cm3), dried, and the solvent evaporated. The residue was chromatographed, eluting with a gradient (20-50%) of EtOAclight petroleum, to give *acetate* **10c** (1.27 g, 26%) as white prisms, mp (from EtOAclight petroleum) 93-94 °C (Found: C, 53.6; H, 4.9; N, 6.3. C10H11NO5 requires C, 53.3; H, 4.9; N, 6.2%); max/cm-1 1728, 1514, 1340, and 1281; H3.69 (2 H, s, CH2), 3.72 (3 H, s, OCH3), 3.93 (3 H, s, OCH3), 6.94 (1 H, d, *J* 9.1, 3-H), 8.12 (1 H, d, *J* 2.7, 6-H), and 8.21 (1 H, dd, *J* 9.1, 2.7, 4-H); C 35.5, 52.2, 56.3, 110.0, 124.1, 125.2, 126.7, 141.1, 162.5, and 170.9.

***Methyl 2-(methylsulphonyl)-5-nitrophenylacetate 10d***

A solution of crude **12** (3.3 g, nominally 21.8 mmol) and *c*H2SO4 (10 cm3) in MeOH (100 cm3) was heated at reflux temperature for 16 h. The solvent was evaporated and the residue partitioned between EtOAc (100 cm3) and water (100 cm3). The organic fraction was washed with brine (50 cm3), dried and evaporated. The residue was chromatographed, eluting with 50% EtOAclight petroleum, to give *methyl 2-hydroxy-5-nitrophenylacetate* **13**, (4.10 g, 89%) as white prisms, mp (from EtOAclight petroleum) 147-150 °C (Found: C, 51.4; H, 4.3; N, 6.7. C9H9NO5 requires C, 51.2; H, 4.3: N, 6.6%); max/cm-1 3252, 1701, 1532, 1343, 1285, and 1223; H3.68 (2 H, s, CH2), 3.70 (3 H, s, OCH3), 6.96 (1 H, d, *J* 8.9, 3-H), 8.02 (1 H, dd, *J* 8.9, 2.5, 4-H), 8.07 (1 H, d, *J* 2.5, 6-H), and 10.53 (1 H, br s, OH); C 34.8, 51.9, 114.7, 121.7, 124.4, 126.6, 139.6, 161.5, and 170.9.

A solution of **13** (4.0 g,18.9 mmol), *N*,*N*-dimethylaminothiocarbamoyl chloride (3.51 g, 28.4 mmol), and Et3N (3.2 cm3, 22.7 mmol) in DCM (200 cm3) was stirred at 20 °C for 16 h. The solution was washed with sat. aq. KHCO3 solution (100 cm3), water (2 x 100 cm3), brine (50 cm3), dried, and the solvent evaporated. The residue was chromatographed, eluting with 30% EtOAclight petroleum, to give *methyl 2-(N,N-dimethylaminothiocarbonyloxy)-5-nitrophenylacetate* **14** (4.61 g, 82%), as a white solid, mp (EtOAclight petroleum) 115-117 °C (Found: C, 48.6; H, 4.9; N, 9.4; S, 10.5. C12H14N2O5S requires C, 48.3; H, 4.7; N, 9.4; S, 10.75%); max/cm-1 1738, 1545, 1514, and 1352; H3.37 (3 H, s, NCH3), 3.47 (3 H, s, NCH3), 3.67 (2 H, s, CH2), 3.71 (3 H, s, OCH3), 7.24 (1 H, d, *J* 8.8, 3-H), 8.18 (1 H, dd, *J* 8.8, 2.7, 4-H), and 8.26 (1 H, d, *J* 2.7, 6-H); C 36.2, 38.8, 43.4, 52.4, 123.8, 124.8, 126.8, 129.2, 145.4, 156.9, 170.0, and 185.2.

A solution of **14** (3.47 g, 11.6 mmol) in 1,2-dichlorobenzene (50 cm3) was heated at 180 °C for 3 h under N2. The solution was cooled to 20 °C and chromatographed, eluting with a gradient (2050%) of EtOAclight petroleum, to give *methyl 2-(N,N-dimethylaminocarbonylthio)-5-nitrophenylacetate* **15** (3.05 g, 88%), as a white solid, mp (EtOAclight petroleum) 88-89.5 °C (Found: C, 48.2; H, 4.8; N, 9.4. C12H14N2O5S requires C, 48.3; H, 4.7; N, 9.4%); max/cm-1 1732,1669, 1520, and 1342; H3.03 (3 H, br s, NCH3), 3.11 (3 H, br s, NCH3), 3.71 (3 H, s, OCH3), 3.92 (2 H, s, CH2), 7.39 (1 H, d, *J* 8.5, 3-H), 8.13 (1 H, dd, *J* 8.5, 2.5, 4-H), and 8.23 (1 H, d, *J* 2.5, 6-H); C 37.1 (2), 39.9, 52.3, 122.3, 125.5, 137.4, 138.3, 140.4, 148.4, 164.1, and 170.5.

A mixture of **15** (4.22 g, 14.15 mmol) and 2 M KOH solution (140 cm3) in MeOH (140 cm3) was heated at reflux for 2 h. The solution was cooled to 20 °C and Me2SO4 (13.4 cm3, 0.14 mol) added dropwise and the solution stirred for 1 h. The solvent was evaporated and the residue partitioned between EtOAc (200 cm3) and sat. aq. KHCO3 solution (200 cm3). The organic fraction was concentrated to 100 cm3 and the precipitate filtered to give *methyl 2-(methylthio)-5-nitrophenylacetate* **16** (0.81 g, 23%), as white prisms, mp (EtOAc) 97-99 °C (Found: C, 49.5; H, 4.75; N, 5.7; S, 13.3. C10H11NO4S requires C, 49.8; H, 4.6; N, 5.8; S, 13.3%); max/cm-1 1734, 1514, and 1342; H2.57 (3 H, s, SCH3), 3.74 (3 H, s, OCH3), 3.80 (2 H, s, CH2), 7.28 (1 H, d, *J* 8.8, 3-H), and 8.08 (1 H, d, J 2.5, 6-H), 8.13 (1 H, dd, *J* 8.5, 2.5, 4-H); H 15.3, 38.7, 52.4, 122.9, 124.1, 125.2, 132.3, 144.6, 148.4, and 170.2. The mother liquor was washed with 0.1 M NaOH (2 x 100 cm3) and the combined basic washes adjusted to pH 1 with *c*HCl. The suspension was filtered and the solid dried, and dissolved in MeOH (100 cm3) and DMF (3 drops). SOCl2 (2.5 cm3, 34 mmol) was added carefully and the solution stirred at 80 °C for 4 h. The solvent was evaporated and the residue partitioned between EtOAc (100 cm3) and sat. aq. KHCO3 solution (100 cm3). The organic fraction was dried, the solvent evaporated and the residue chromatographed, eluting with 50% EtOAclight petroleum, to give further **16** (1.45 g, 42%; combined yield 65%), spectroscopically identical to an authentic sample.

MCPBA (70%, 5.63 g, 20.6 mmol) was added in portions to a solution of **16** (2.26 g, 9.37 mmol) in DCM (100 cm3) and the solution stirred at 20 °C for 2 h. The solvent was evaporated and the residue chromatographed, eluting with a gradient (20-50%) of EtOAclight petroleum. The solution was washed with 0.1 M NaOH (100 cm3) and water (50 cm3), dried, and the solvent evaporated to give **10d** (2.46 g, 96%) as a white solid, mp (EtOAclight petroleum)149-151 °C (Found: C, 43.9; H, 4.1; N, 5.1; S, 11.6. C10H11NO6S requires C, 43.95; H, 4.1; N, 5.1; S, 11.7%); max/cm-1 1738, 1698, 1531, 1352, 1304, and 1148; H3.19 (3 H, s, SO2CH3), 3.78 (3 H, s, OCH3), 4.32 (2 H, s, CH2), 8.23 (1 H, d, *J* 2.2, 6-H), 8.32 (1 H, dd, *J* 8.6, 2.2, 4-H), and 8.28 (1 H, d, *J* 8.6, 3-H); C 38.4, 44.6, 52.7, 123.2, 128.0, 131.8, 136.3, 144.6, 150.4, and 170.7.

**Reductive methylation of nitrophenylacetates 10**

***Methyl 3-(N-methylamino)phenylacetate 17a***

A mixture of methyl 3-nitrophenyl acetate **10a** (1.84, 9.4 mmol) and Pd/C (100 mg) in EtOH (100 cm3) was stirred under H2 (60 psi) for 1 h. The mixture was filtered through celite, washed with EtOH (2 x 30 cm3), and the solvent evaporated. The residue was dissolved in THF (20 cm3) and added to a solution of formic acetic anhydride (prepared by adding formic acid (1.8 cm3, 46.6 mmol) to acetic anhydride (3.6 cm3) at 0 °C, warming at 50 °C for 30 min) in THF (20 cm3) at -20 °C and the mixture stirred at -20 °C for 30 min. The solution was warmed to 20 °C, the solvent evaporated and the residue partitioned between EtOAc (100 cm3) and sat. aq. KHCO3 (100 cm3). The organic fraction was washed with water (50 cm3), dried, and the solvent evaporated. The residue was dissolved in THF (50 cm3) and BH3.DMS (3.6 cm3, 36.4 mmol) added dropwise and the mixture stirred at 20 °C for 1 h. MeOH (5 cm3) was added dropwise (CAUTION), then 5 M HCl (5 cm3), and the mixture stirred at 50 °C for 30 min. The solvent was evaporated and the residue partitioned between EtOAc (100 cm3) and KHCO3 (100 cm3). The aqueous fraction was extracted with EtOAc (2 x 50 cm3), the combined organic extracts dried, and the solvent evaporated. The residue was chromatographed, eluting with 30% EtOAc, to give *acetate* **17a** (0.75 g, 44%) as an oil, max(thin film)/cm-1 3144, 1736, 1607, 1263, and 1153; H 2.84 (3 H, s, NCH3), 3.56 (2 H, s, CH2), 3.69 (3 H, s, OCH3), 3.73 (1 H, br s, NH), 6.51-6.54 (2 H, m, 2-H, 4-H), 6.63 (1 H, d, *J* 7.1, 6-H), and 7.12-7.17 (1 H, m, 5-H); C30.7, 41.4, 51.9, 111.2, 113.1, 118.1, 129.4, 134.9, 149.5, and 172.2; *m/z* 179.0948 (M+. C10H13NO2 requires 179.0948); *m/z* 179 (M+, 100%), and 120 (85).

# Methyl 2-methyl-5-(N-methylamino)phenylacetate 17b

Similarly, reductive methylation of **10b** gave *acetat*e **17b** (65%) as an oil, max/cm-1 3420, 1734, 1616, 1512, and 1261; H2.17 (3 H, s, CH3), 2.79 (3 H, s, NCH3), 3.57 (2 H, s, CH2), 3.68 (3 H, s, OCH3), 6.45-6.49 (2 H, m, 4-H, 6-H), 6.98 (1 H, d, *J* 7.9, 3-H); C 18.5, 30.9, 39.3, 51.9, 111.5, 114.5, 125.3, 131.0, 133.2, 147.7, and 172.1; *m/z* 193.1108 (M+. C11H15NO2 requires193.1103); *m/z* 193 (M+, 100%), 134 (75), and 120 (65).

# Methyl 2-methoxy-5-(N-methylamino)phenylacetate 17c

Similarly, reductive methylation of **10c** gave *acetat*e **17c** (68%) as an oil, max/cm-1 3407, 1736, 1510, and 1236; H3.30 (1 H, br s, NH), 2.79 (3 H, s, NCH3), 3.59 (2 H, s, CH2), 3.68 (3 H, s, OCH3), 3.76 (3 H, s, OCH3), 6.51-6.54 (2 H, m, 3-H, 6-H), and 6.77 (1 H, dd, *J* 7.4, 4.1, 4-H); C31.5, 35.8, 51.9, 56.3, 111.8, 112.3, 115.9, 123.8, 143.5, 150.0, and 172.4; *m/z* 209.1049 (M+. C11H15NO3 requires 209.1052); *m/z* 209 (M+, 100%), 194 (70), and 162 (80).

# Methyl 2-methylsulfonyl-5-(N-methylamino)phenylacetate 17d

Similarly, reductive methylation of **10d** gave *acetate* **17d** (56%) as an oil, max/cm-1 3405, 1736, 1605, 1290, and 1150; H2.88 (3 H, d, *J* 5.1, NCH3), 3.07 (3 H, s, SO2CH3), 3.73 (3 H, s, OCH3), 4.10 (2 H, s, CH2), 4.36 (1 H, br s, NH), 6.42 (1 H, d, *J* 2.5, 6-H), 6.54 (1 H, dd, *J* 8.8 and 2.5, 4-H), and 7.81 (1 H, d, *J* 8.8, 3-H); C29.9, 38.6, 45.2, 52.2, 110.4, 115.2, 125.7, 132.2, 135.3, 153.0, and 171.9; *m/z* 257.0721 (M+. C11H15NO4S requires 257.0722); *m/z* 257 (M+, 70%), 226 (16), 198 (30), and 178 (100).

#### Reaction of amines 17 with 4-nitrobenzylchloroformate

# Methyl 3-[N-methyl-N-(4-nitrobenzyloxycarbonyl)]aminophenylacetate 18a

A solution of 4-nitrobenzyl chloroformate (0.70 g, 3.26 mmol) in THF (10 cm3) was added to a solution of **17a** (0.70 g, 3.92 mmol) in THF (5 cm3) and the solution stirred at 20 °C for 16 h. The solvent was evaporated, the residue dissolved in EtOAc (50 cm3), washed with 5% citric acid solution (50 cm3), brine (50 cm3), dried, and the solvent evaporated. The residue was chromatographed, eluting with a gradient (20-30%) of EtOAclight petroleum, to give *acetate* **18a** (1.05 g, 90%), as a white solid, mp (EtOAclight petroleum) 60-61 °C (Found: C, 60.6; H, 5.0; N, 7.8. C18H18N2O6 requires C, 60.3, H, 5.1; N, 7.8%); max/cm-1 1736, 1698, 1518, 1300, and 1167; H 3.34 (3 H, s, NCH3), 3.64 (2 H, s, CH2), 3.71 (3 H, s, OCH3), 5.24 (2 H, s, CH2O), 7.14-7.21 (3 H, m, 2-H, 4-H, 6-H), 7.34 (1 H, t, *J* 7.8, 5-H), 7.42 (2 H, m, 2-H, 6-H), and 8.18 (2 H, d, *J* 8.6, 3-H, 5-H); C 37.9, 40.8, 52.1, 65.9, 123.7 (2), 124.5, 126.8, 127.5, 127.8, 129.1 (2), 134.9, 143.0, 143.9, 147.5, 154.9, and 171.6; *m/z* (DEI) 358.1153 (M+. C18H18N2O6 requires 358.1165); *m/z* (DEI) 358 (M+, 90%), 314 (20), 192 (22), and 178 (100).

***Methyl 2-methyl-5-[N-methyl-N-(4-nitrobenzyloxycarbonyl)]aminophenylacetate 18b***

Similarly, reaction of **17b** as described above gave*acetate* **18b** (92%) as white prisms, mp (EtOAclight petroleum) 103-105.5 °C (Found: C, 61.5; H, 5.2; N, 7.8. C19H20N2O6 requires C, 61.3; H, 5.4; N, 7.5%); max/cm-1 1732, 1699, 1520, 1346, and 1165; 2.31 (3 H, s, CH3), 3.31 (3 H, s, NCH3), 3.63 (2 H, s, CH2), 3.70 (3 H, s, OCH3), 5.23 (2 H, s, CH2O), 7.04-7.10 (2 H, m, 4-H, 6-H), 7.19 (1 H, d, *J* 8.0, 3-H), 7.40-7.45 (2 H, m, 2-H, 6-H), and 8.18 (2 H, d, *J* 8.3, 3-H, 5-H); C 19.2, 38.1, 38.8, 52.1, 65.8, 123.7 (2), 124.7, 127.8 (3), 130.9, 133.5, 135.4, 140.8, 144.0, 147.5, 155.0, and 171.5.

# Methyl 2-methoxy-5-[N-methyl-N-(4-nitrobenzyloxycarbonyl)]aminophenylacetate 18c

Similarly, reaction of **17c** as described above gave *acetate* **18c** (1.03 g, 95%) as a white solid, mp (EtOAclight petroleum) 101-102 °C (Found: C, 58.8; H, 5.2; N, 7.3. C19H20N2O7 requires C, 58.8; H, 5.2; N, 7.2%); max/cm-1 1732, 1699, 1518, 1346, 1302, and 1163; H 3.30 (3 H, s, NCH3), 3.63 (2 H, s, CH2), 3.71 (3 H, s, OCH3), 3.83 (3 H, s, OCH3), 5.21 (2 H, s, CH2O), 6.86 (1 H, d, *J* 8.6, 3-H), 7.08-7.13 (2 H, m, 4-H, 6-H), 7.36-7.40 (2 H, m, 2-H, 6-H), and 8.18 (2 H, br d, *J* 7.3, 3-H, 5-H); 13C NMR (CDCl3)  35.4, 38.4, 52.0, 55.7, 65.7, 110.7, 123.7 (3), 126.1, 127.6 (2), 129.0, 135.3, 144.1, 147.4, 155.2, 156.1, and 171.8.

***Methyl 2-methylsulfonyl-5-[N-methyl-N-(4-nitrobenzyloxycarbonyl)]aminophenyl-acetate 18d***

Similarly, reaction of **17d** as described above gave *acetate* **18d** (0.67 g, 45%) as a white solid, mp (EtOAclight petroleum) 100-105 °C (Found: C, 52.3; H, 4.8; N, 6.1. C19H20N2O8S requires C, 52.3; H, 4.6; N, 6.4%.); max/cm-1 1736, 1719, 1332, 1249, and 1161; H[(CD)3)2SO] 3.18 (3 H, s, SO2CH3), 3.35 (3 H, s, NCH3), 3.61 (3 H, s, OCH3), 4.17 (2 H, s, CH2), 5.46 (2 H, s, CH2O), 7.56 (1 H, d, *J* 2.4, 6-H), 7.59-7.67 (3 H, m, 4-H, 2-H, 6-H), 7.94 (1 H, d, *J* 8.6, 3-H), and 8.22 (2 H, br d, *J* 8.7, 3-H, 5-H);  [(CD)3)2SO] 36.9, 37.9, 44.1, 51.7, 65.9, 123.5 (2), 124.1, 128.2 (2), 129.2, 130.2, 134.5, 135.5, 144.0, 147.0 (2), 153.8, and 171.0.

**Hydrolysis of acetates 18**

***3-[N-Methyl-N-(4-nitrobenzyloxycarbonyl)]aminophenylacetic acid 19a***

A mixture of **18a** (1.11 g, 3.1 mmol) and 1 M NaOH solution (15 cm3, 15 mmol) in MeOH (20 cm3) was stirred at 20 °C for 1 h. The mixture was diluted with water (50 cm3) and extracted with diethyl ether (50 cm3). The pH of the aqueous fraction was adjusted to 2 with 1 M HCl and extracted with EtOAc (3 x 50 cm3). The combined organic extracts were dried and the solvent evaporated. The residue was recrystallised from EtOAc to give *acetic acid* **19a** (0.94 g, 88%) as colourless needles, mp (EtOAc) 137-139 °C (Found: C, 59.45; H, 4.6; N, 8.05. C17H16N2O6 requires C, 59.3; H, 4.7; N, 8.1%); max/cm-1 3450-3525, 1714, 1682, 1514, 1345, and 1149;  [(CD3)2SO] 3.26 (3 H, s, NCH3), 3.60 (2 H, s, CH2), 5.24 (2 H, s, CH2O), 7.14-7.38 (4 H, m, 2-H, 4-H, 5-H, 6-H), 7.56 (2 H, d, *J* 9.0, 2-H, 6-H), 8.21 (2 H, d, *J* 9.0, 3-H, 5-H), and 10.5 (1 H, br s, CO2H); C [(CD3)2SO] 37.5, 40.3, 65.3, 123.5 (2), 124.0, 126.7, 127.3, 127.9 (2), 128.6, 135.8, 142.7, 144.5, 146.9, 154.2, and 172.4.

***2-Methyl-5-[N-methyl-N-(4-nitrobenzyloxycarbonyl)]aminophenylacetic acid 19*b**

Similarly, reaction of **18b** as described above gave *acetic acid* **19b** (93%) as white prisms, mp (EtOAc) 159-160 °C (Found: C, 60.2; H, 4.9; N, 8.0. C18H18N2O6 requires C, 60.3; H, 5.1; N, 7.8%); max/cm-1 3425-3525, 1701, 1518, and 1350; H [(CD3)2SO] 2.22 (3 H, s, CH3), 3.23 (3 H, s, NCH3), 3.60 (2 H, s, CH2), 5.23 (2 H, s, CH2O), 7.13 (1 H, dd, *J* 8.1, 2.0, 4-H), 7.17-7.20 (2 H, m, 3-H, 6-H), 7.52-7.56 (2 H, m, 2-H, 6-H), 8.20 (2 H, d, *J* 8.6, 3-H, 5-H), and 12.41 (1 H, br s, CO2H); C 18.5, 37.6, 38.6, 65.3, 123.5 (2), 124.1, 127.6, 127.8 (2), 130.2, 134.4, 134.8, 140.4, 144.6, 146.8, 154.2, and 172.3.

***2-Methoxy-5-[N-methyl-N-(4-nitrobenzyloxycarbonyl)]aminophenylacetic acid 19c***

Similarly, reaction of **18c** as described above gave *acetic acid* **19c** (97%) as white prisms, mp (EtOAc) 130-131 °C (Found: C, 57.8; H, 4.8; N, 7.6. C18H18N2O7 requires C, 57.8; H, 4.9; N, 7.5%); max/cm-1 3410-3480, 1712, 1520, and 1342; H [(CD3)2SO] 3.22 (3 H, s, NCH3), 3.52 (2 H, s, CH2), 3.78 (3 H, s, OCH3), 5.22 (2 H, s, CH2O), 6.97 (1 H, d, *J* 8.6, 3-H), 7.19-7.23 (2 H, m, 4-H, 6-H), 7.52-7.55 (2 H, m, 2-H, 6-H), 8.20 (2 H, d, *J* 8.5, 3-H, 5-H), and 12.22 (1 H, br s, CO2H); C [(CD3)2SO] 35.3, 37.9, 55.6, 65.2, 110.8, 123.5 (2), 124.0, 125.6, 127.7 (2), 128.8, 135.1, 144.7, 146.8, 154.4, 155.6, and 172.2.

2-Methylsulfonyl-5-[N-methyl-N-(4-nitrobenzyloxycarbonyl)]aminophenylacetic acid 19d

Similarly, reaction of **18d** as described above gave *acetic acid* **19d** (81%) as a white foam, mp (MeOH) 128-129 °C (Found: C, 49.6; H, 4.6; N, 6.2; S, 7.3. C18H18N2O8S requires C, 51.2; H, 4.3; N, 6.6; S, 7.6%); max/cm-1 3350-3450, 1728, 1694, 1516, 1344, and 1161; H [(CD3)2SO] 3.19 (3 H, s, SO2CH3), 3.34 (3 H, s, NCH3), 4.07 (2 H, s, CH2), 5.31 (2 H, s, CH2O), 7.52 (1 H, d, *J* 2.2, 6-H), 7.58 (1 H, dd, *J* 8.6 and 2.2, 4-H), 7.62 (2 H, br d, *J* 8.8, 2-H, 6-H), 7.93 (1 H, d, *J* 8.6, 3-H), 8.23 (2 H, br d, *J* 8.8, 3-H, 5-H), and 12.49 (1 H, br s, CO2H); C [(CD3)2SO] 36.9, 38.3, 44.1, 65.9, 123.5 (2), 123.9, 128.2 (2), 129.3, 130.1, 135.2, 135.5, 144.0, 146.9, 147.1, 153.8, and 171.9; *m/z* (FAB+) 423.0879 (MH+. C18H19N2O8S requires 423.0862); *m/z* (FAB+) 423 (MH+, 1 %), 405 (1), and 377 (1).

**Protection of 3-(*N*-methylamino)phenylacetamides 17**

# Methyl 3-[N-methyl-N-(tert-butyloxycarbonyl)]aminophenylacetate 20a

A solution of **17a** (1.55 g, 8.65 mmol) and di-*tert*-butyldicarbonate (2.83 g, 13.0 mmol) in THF (100 cm3) was heated at reflux for 16 h. The solvent was evaporated and the residue chromatographed, eluting with 25% EtOAclight petroleum, to give *acetate* **20a** (2.29 g, 95%) as an oil, max(thin film)/cm-1 1740, 1700, 1366, and 1153; H1.45 (9 H, s, C(CH3)3), 3.27 (3 H, s, NCH3), 3.62 (2 H, s, CH2), 3.69 (3 H, s, OCH3), 7.08 (1 H, br d, *J* 7.5, 5-H), 7.13-7.17 (2 H, m, 2-H, 4-H), and 7.26 (1 H, d, *J* 7.5, 6-H); C 28.3 (3), 37.3, 41.0, 52.0, 80.3, 124.1, 126.2, 126.4, 128.6, 134.3, 144.0, 154.7, and 171.8; *m/z* 279.1472 (M+. C15H21NO4 requires 279.1471); *m/z* 279 (M+, 8%), 223 (25), 179 (90), and 57 (100).

# Methyl 2-methyl-5-[N-methyl-N-(tert-butyloxycarbonyl)]aminophenylacetate 20b

Similarly, reaction of **17b** as described above gave *acetate* **20b** (93%) as an oil, max(thin film)/cm-1 1740, 1698, 1366, and 1154; H1.44 (9 H, s, C(CH3)3), 2.28 (3 H, s, CH3), 3.23 (3 H, s, NCH3), 3.61 (2 H, s, CH2), 3.69 (3 H, s, OCH3), and 7.03-7.13 (3 H, m, 3-H, 4-H, 6-H); C19.0, 28.3 (3), 37.3, 39.0, 52.0, 80.2, 124.2, 127.2, 130.4, 132.8, 133.9, 141.8, 154.8, and 171.7; *m/z* 293.1627 (M+. C16H23NO4 requires 293.1627); *m/z* 293 (M+, 10%), 237 (40), 193 (100), and 57 (90).

# Methyl 2-methoxy-5-[N-methyl-N-(tert-butyloxycarbonyl)]aminophenylacetate 20c

Similarly, reaction of **17c** as described above gave *acetate* **20c** (98%) as an oil, max(thin film)/cm-1 1742, 1698, 1366, and 1154; H1.44 (9 H, s, C(CH3)3), 3.22 (3 H, s, NCH3), 3.61 (2 H, s, CH2), 3.69 (3 H, s, OCH3), 3.81 (3 H, s, OCH3), 6.81 (1 H, d, *J* 8.6, 3-H), 7.02-7.10 (2 H, m, 4-H, 6-H); C28.3 (3), 35.6, 37.6, 51.9, 55.7, 80.0, 110.4, 123.0, 125.5, 128.4, 136.5, 155.0, 155.2, 170.2; *m/z* 309.1576 (M+. C16H23NO5 requires 309.1576); *m/z* 309 (M+, 12%), 253 (70), 209 (90), and 194 (100).

Methyl 2-methanesulfonyl-5-[N-methyl-N-(tert-butyloxycarbonyl)]aminophenylacetate 20d

Similarly, reaction of **17d** as described above gave *acetate* **20d** (37%) as a foam, max(thin film) /cm-1 1736, 1703, 1348, 1308, and 1152; H1.50 (9 H, s, C(CH3)3), 3.12 (3 H, s, SO2CH3), 3.30 (3 H, s, NCH3), 3.73 (3 H, s, OCH3), 4.19 (2 H, s, CH2), 7.33 (1 H, d, *J* 2.2, 6-H), 7.41 (1 H, dd, *J* 8.7 and 2.2, 4-H), and 8.00 (1 H, d, *J* 8.7, 3-H); C28.2 (3), 36.6, 38.4, 44.9, 52.3, 81.7, 123.4, 128.2, 130.7, 134.3, 134.4, 148.4, 153.8, and 171.5; *m/z* 357.1239 (M+. C16H23NO6S requires 357.1246); *m/z* 357 (M+, 5%), 326 (10), 257 (25), 225 (40), and 57 (100).

#### Hydrolysis of phenylacetates 20

***3-[N-Methyl-N-(tert-butyloxycarbonyl)]aminophenylacetic acid 21a***

A mixture of **20a** (2.57 g, 8.65 mmol) and 1 M NaOH solution (40 cm3, 40 mmol) in MeOH (80 cm3) was stirred at 20 °C for 1 h. The mixture was diluted with water (80 cm3) and extracted with diethyl ether (50 cm3). The pH of the aqueous fraction was adjusted to 2 with 1 M HCl and extracted with EtOAc (3 x 80 cm3). The combined organic extracts were dried and the solvent evaporated. The residue was recrystallised to give *acetic acid* **21a** as a white solid, mp (EtOAclight petroleum) 84-85.5 °C (Found C, 63.3; H, 7.4; N, 5.4. C14H19NO4 requires C, 63.4; H, 7.2; N, 5.3%); max/cm-1 3370-3450, 1695, 1669, 1373, and 1153; H 1.44 (9 H, s, C(CH3)3), 3.25 (3 H, s, NCH3), 3.63 (2 H, s, CH2), 5.10 (1 H, br s, CO2H), 7.08 (1 H, br d, *J* 7.8, 5-H), 7.14-7.18 (2 H, m, 2-H, 4-H), and 7.29 (1 H, d, *J* 7.8, 6-H); C 28.3 (3), 37.3, 40.8, 80.5, 124.2, 126.3, 126.5, 128.7, 133.7, 144.0, 154.7, and 176.7; *m/z* 265.1308 (M+. C14H19NO4 requires 265.1314); *m/z* 265 (M+, 5%), 209 (35), 165 (90), and 57 (100).

***2-Methyl-5-[N-methyl-N-(tert-butyloxycarbonyl)]aminophenylacetic acid 21b***

Similarly, reaction of **20b** as described above gave *acetic acid* (**21b**) (90%) as white crystals, mp (EtOAclight petroleum) 138-142 °C (Found: C, 64.3; H, 7.7; N, 4.9. C15H21NO4 requires C, 64.5; H, 7.6; N, 5.0%); max/cm-1 3110-3190, 1701, 1695, 1368, and 1155; H 1.43 (9 H, s, C(CH3)3), 2.28 (3 H, s, CH3), 3.22 (3 H, s, NCH3), 3.67 (2 H, s, CH2), and 7.03-7.13 (4 H, m, 3-H, 4-H, 6-H, CO2H); C 19.0, 28.8 (3), 37.3, 38.8, 80.3, 124.4, 127.4, 130.5, 132.2, 134.0, 141.8, 154.8, and 176.7; *m/z* 279.1475 (M+. C15H21NO4 requires 279.1471); *m/z* 279 (M+, 10%), 223 (50), 179 (75), and 57 (100).

***2-Methoxy-5-[N-methyl-N-(tert-butyloxycarbonyl)]aminophenylacetic acid 21c***

Similarly, reaction of **20c** as described above gave *acetic acid* **21c** (78%) as a white solid**,** mp (EtOAc) 128-129 °C (Found: C, 61.1; H, 7.4; N, 4.7. C15H21NO5 requires C, 61.0; H, 7.2; N, 4.7%); max/cm-1 3160-3240, 1736, 1657, 1502, 1368, and 1162; H 1.43 (9 H, s, C(CH3)3), 3.21 (3 H, s, NCH3), 3.79 (2 H, s, CH2), 3.81 (3 H, s, OCH3), 6.81 (1 H, d, *J* 8.6, 3-H), 7.03-7.12 (2 H, m, 4-H, 6-H), and 7.89 (1 H, s, CO2H); C 28.8 (3), 35.6, 37.6, 55.7, 80.2, 110.4, 122.4, 125.7, 128.6, 136.6, 155.0, 155.1, and 177.0.

***2-Methanesulfonyl-5-[N-methyl-N-(tert-butyloxycarbonyl)]aminophenylacetic acid 21d***

Similarly, reaction of **20d** as described above gave *acetic acid* **21d** (95%) as a white solid, mp (EtOAclight petroleum) 140 °C (dec.); (Found: H, 6.2; N, 4.2; S, 8.9. C15H21NO6S requires H, 6.2; N, 4.1; S, 9.3%); max/cm-1 3460, 1703, 1296, and 1155; H 1.43 (s, 9 H, C(CH3)3), 3.11 (3 H, s, SO2CH3), 3.21 (3 H, s, NCH3), 4.20 (2 H, s, CH2), 5.40 (1 H, s, CO2H), 7.37 (1 H, d, *J* 2.2, 6-H), 7.42 (1 H, dd, *J* 8.6 and 2.2, 4-H), and 7.98 (1 H, d, *J* 8.6, 3-H); C 28.2 (3), 36.6, 38.4, 44.9, 81.9, 123.5, 128.3, 130.7, 133.5, 134.3, 148.5, 153.8, and 175.1.

**Coupling of phenyl acetic acids 21 with *N*,*N*-dimethylaminoethylamine**

N-[2-(N,N-Dimethylamino)ethyl]-3-[N-methyl-N-(tert-butyloxycarbonyl)]amino-phenylacetamide 22a

A solution of **21a** (1.08 g, 3.7 mmol) and CDI (0.89 g, 5.5 mmol) in DMF (10 cm3) was heated at 50 °C for 10 min. *N*,*N*-Dimethylaminoethylamine (0.80 cm, 7.3 mmol) was added dropwise and the solution stirred at 20 °C for 4 h. The solution was poured into water (150 cm3) and extracted with EtOAc (3 x 50 cm3). The combined organic extracts were washed with 0.1 M NaOH solution (50 cm3), water (50 cm3), brine (50 cm3), dried, and the solvent evaporated to give *acetamide* **22a** (1.10 g, 82%) as an oil, max(thin film)/cm-1 3320, 1698, 1655, 1365, and 1153; H[(CD3)2SO] 1.46 (9 H, s, C(CH3)3), 2.17 (6 H, s, N(CH3)2), 2.35 (2 H, t, *J* 6.0, CH2N), 3.23 (3 H, s, NCH3), 3.28 (2 H, q, *J* 5.7, CH2N), 3.54 (2 H, s, CH2), 6.16 (1 H, br s, CONH), 7.07 (1 H, br d, *J* 7.5, 6-H), 7.12-7.18 (2 H, m, 2-H, 4-H) 7.29 (1 H, dd, *J* 7.7 and 7.5, 5-H); C[(CD3)2SO] 28.3 (3), 37.0, 37.3, 43.5, 45.1 (2), 57.8, 80.4, 124.1, 126.2, 126.3, 128.9, 135.6, 144.1, 154.7, and 170.7; *m/z* (CI, NH3) 336.2284 (MH+. C18H30N3O3 requires 336.2287); *m/z* (CI, NH3) 336 (MH+, 100%), 280 (10), and 236 (70).

N-[2-(N,N-Dimethylamino)ethyl]-2-methyl-5-[N-methyl-N-(tert-butyloxycarbonyl)]-aminophenylacetamide 22b

Similarly, reaction of **21b** as described above gave *acetamide* **22b** (97%) as an oil, max/cm-1 3331, 1695, 1655, 1366, and 1153; H1.45 (9 H, s, C(CH3)3), 2.16 (6 H, s, N(CH3)2), 2.27 (3 H, s, CH3), 2.35 (2 H, t, *J* 6.1, CH2N), 3.24 (3 H, s, NCH3), 3.29 (2 H, br dt, *J* 6.1 and 5.6, CH2N), 3.55 (2 H, s, CH2), 6.08 (1 H, br s, CONH), 7.04-7.09 (2 H, m, 4-H, 6-H), and 7.14 (1 H, d, *J* 7.9 Hz, 3-H); C19.0, 28.3 (3), 36.9, 37.4, 41.7, 45.0 (2), 57.8, 80.3, 124.5, 127.4, 130.7, 133.8, 134.2, 142.0, 154.8, and 170.6; *m/z* 349.2363 (M+. C19H31N3O3 requires 349.2365); *m/z* 349 (M+, 1%), 279 (1), 233 (2), 178 (5), 71 (30), and 58 (100).

N-[2-(N,N-Dimethylamino)ethyl]-2-methoxy-5-[N-methyl-N-(tert-butyloxycarbonyl)]-aminophenylacetamide 22c

Similarly, reaction of **21c** as described above gave *acetamide* **22c** (82%) as an oil, max(thin film)/cm-1 3335, 1695, 1660, 1505, 1367, and 1155; H 1.44 (9 H, s, C(CH3)3), 2.17 (6 H, s, N(CH3)2), 2.34 (2 H, t, *J* 6.0, CH2N), 3.21 (3 H, s, NCH3), 3.24-3.29 (2 H, m, CH2N), 3.52 (2 H, s, CH2), 3.84 (3 H, s, OCH3), 6.45 (1 H, s, CONH), 6.82 (1 H, d, *J* 9.4, 3-H), 7.10-7.12 (2 H, m, 4-H, 6-H); C 28.3 (3), 36.9, 37.6, 38.6, 45.1 (2), 55.5, 57.7, 80.1, 110.3, 124.0, 125.7, 128.6, 136.9, 154.8, 155.0, and 171.0; *m/z* 365.2306 (M+. C19H31N3O4 requires 365.2315); *m/z* 365 (M+, 1%), 294 (12), 194 (13), 71 (15), and 58 (100).

N-[2-(N,N-Dimethylamino)ethyl]-2-methanesulphonyl-5-[N-methyl-N-(tert-butyloxycarbonyl)]-aminophenylacetamide 22d

Similarly, reaction of **21d** as described above gave *acetamide* **22d** (73%) as an oil, max(thin film)/cm-1  3376, 1705, 1671, 1350, and 1150; H 1.50 (9 H, s, C(CH3)3), 2.26 (6 H, s, N(CH3)2), 2.44 (2 H, t, *J* 5.8, CH2N), 3.13 (3 H, s, SO2CH3), 3.21 (3 H, s, NCH3), 3.29-3.35 (2 H, m, CH2N), 3.99 (2 H, s, CH2), 6.75 (1 H, br s, CONH), 7.40 (1 H, dd, *J* 8.7 and 2.2, 4-H), 7.46 (1 H, d, *J* 2.2, 6-H), 7.97 (1 H, d, *J* 8.7, 3-H); C 28.2 (3), 36.7, 37.1, 40.3, 45.0, 45.1 (2), 57.8, 81.7, 123.3, 127.9, 130.3, 133.9, 135.7, 148.5, 153.8, 169.6; *m/z* 413.1986 (M+. C19H31N3O5S requires 413.1984); *m/z* 413 (M+, 0.5%), 398 (1), 343 (4), 287 (10), 71 (30), and 58 (100).

A solution of 4-nitrobenzylbromide (1.39 g, 6.44 mmol) in DMF (5 cm3) was added dropwise to a stirred suspension of methyl 4-(methylamino)phenylacetate9 (1.05 g, 5.86 mmol) and K2CO3 (0.97 g, 7.03 mmol) in DMF (20 cm3) and the mixture stirred at 20 °C for 16 h. The solvent was evaporated and the residue partitioned between EtOAc (100 cm3) and water (100 cm3). The organic fraction was washed with water (50 cm3), brine (25 cm3), dried and the solvent evaporated. The residue was chromatographed, eluting with 10% EtOAclight petroleum, to give *methyl 4-[N-methyl-N-(4-nitrobenzyl)amino]phenylacetate* **23** (1.44 g, 78%) as an orange oil which was used without further purification, H 3.04 (3 H, s, NCH3), 3.52 (2 H, s, CH2), 3.67 (3 H, s, OCH3), 4.59 (2 H, s, CH2N), 6.66 (2 H, br d, *J* 8.7, 3-H, 5-H), 7.13 (2 H, br d, *J* 8.7, 2-H, 6-H), 7.38 (2 H, br d, *J* 8.7, 2-H, 6-H), and 8.17 (2 H, br d, *J* 8.7, 3-H, 5-H); C 38.9, 40.1, 51.9, 56.5, 112.6 (2), 122.6 (2), 123.9, 127.4 (2), 130.1 (2), 147.0, 147.1, 148.2, and 172.6.

A solution of **23** (1.23 g, 3.91 mmol) in MeOH (50 cm3) and 1 M NaOH (20 cm3) was stirred at 20 °C for 2 h. The solution was diluted with water (50 cm3), washed with ether (2 x 30 cm3) and the pH adjusted to 4 with 1 M HCl solution. The solution was extracted with EtOAc (4 x 30 cm3), the combined extracts dried and the solvent evaporated to give *4-[methyl(4-nitrobenzyl)amino]phenylacetic acid* **24** (1.13 g, 96%) as a white solid, mp (from EtOAc–light petroleum) 135-137 °C (Found: C, 63.8; H, 5.4; N, 9.3. C16H16N2O4 requires C, 64.0; H, 5.4; N, 9.3%); H [(CD3)2SO] 3.03 (3 H, s, NCH3), 3.39 (2 H, s, CH2), 4.68 (2 H, s, CH2N), 6.64 (2 H, br d, *J* 8.8, 3-H, 5-H), 7.03 (2 H, d, *J* 8.8, 2-H, 6-H), 7.46 (2 H, d, *J* 8.7, 2-H, 6-H), 8.18 (2 H, br d, *J* 8.7, 3-H, 5-H), and 12.13 (1 H, br s, CO2H); C [(CD3)2SO] 38.7, 39.7, 55.0, 111.9 (2), 122.5 (2), 123.5, 127.8 (2), 129.9 (2), 146.4, 147.4, 147.8, and 173.1.

1. † *Department of Chemistry* [↑](#footnote-ref-2)
2. ‡ *Auckland Cancer Society Research Centre* [↑](#footnote-ref-3)
